# Supplementary material
Source: PubMed Central journal article supplement (PMC4836426)
Supplement: AEM.00216-16_zam999117096so1.pdf [file AEM.00216-16_zam999117096so1.pdf]

1 Supplementary Information

2 Figure S1. Rarefaction analysis for all samples. Curves are color-coded by  
3 oxalate treatment. Legend is ordered chronologically with timepoint 1 at the top  
4 and timepoint 6 at the bottom.

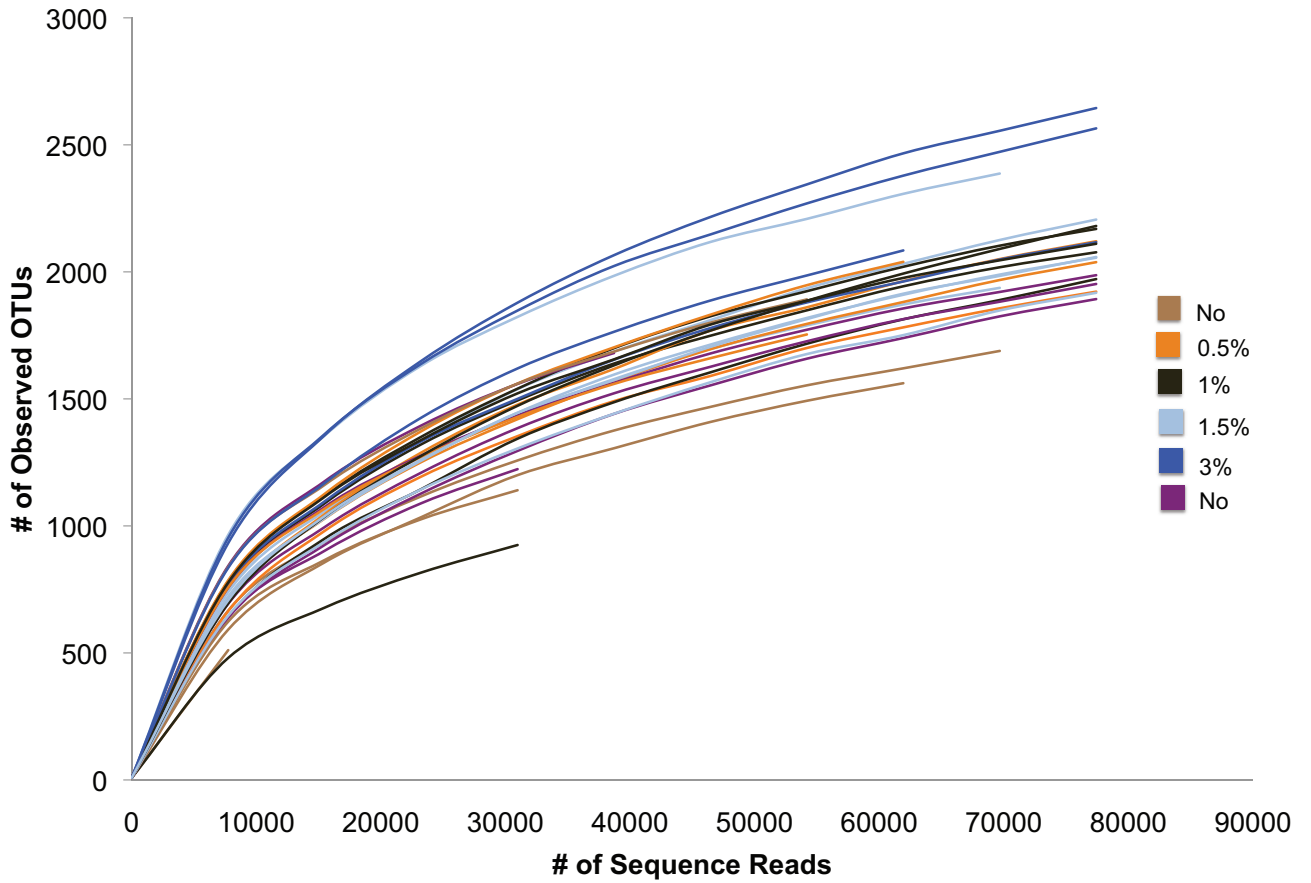

5 Figure S1. Rarefaction analysis for all samples. Curves are color-coded by oxalate treatment. Legend is ordered chronologically with timepoint 1 at the top and timepoint 6 at the bottom.

| Ingredients           | g/kg  |
|-----------------------|-------|
| casein                | 200.0 |
| L-cystine             | 3.0   |
| corn starch           | 300.5 |
| maltodextrin          | 120.0 |
| sucrose               | 100.0 |
| soybean oil           | 70.0  |
| cellulose             | 150.0 |
| mineral mix           | 42.0  |
| vitamin mix           | 12.0  |
| choline<br>bitartrate | 2.5   |
| TBHQ<br>antioxidant   | 0.014 |

Table S1. Recipe for the purified rat chow diet.

| <b>Lowest Assigned Taxonomy</b>   | <b>Taxonomic Level</b> | <b># of OTUs</b> | <b>Diet</b> |
|-----------------------------------|------------------------|------------------|-------------|
| <i>Akkermansia muciniphilia</i>   | species                | 2                | 3%          |
| <i>Allobaculum</i>                | genus                  | 4                | 3%          |
| <i>Clostridiaceae</i>             | family                 | 1                | 3%          |
| <i>Clostridiales</i>              | order                  | 46               | 3%          |
| <i>Coprococcus</i>                | genus                  | 2                | 3%          |
| <i>Coriobacteriaceae</i>          | family                 | 1                | 3%          |
| <i>Desulfovibrio</i>              | genus                  | 3                | 3%          |
| <i>Lacnospiraceae</i>             | family                 | 9                | 3%          |
| <i>Lactobacillus</i>              | genus                  | 2                | 3%          |
| <i>Odoribacter</i>                | genus                  | 2                | 3%          |
| <i>Oscillospira</i>               | genus                  | 10               | 3%          |
| <i>Paenibacillus</i>              | genus                  | 1                | 3%          |
| <i>RC4-4</i>                      | genus                  | 1                | 3%          |
| <i>Rickenellaceae</i>             | family                 | 3                | 3%          |
| <i>Ruminococcaceae</i>            | family                 | 19               | 3%          |
| <i>Ruminococcus</i>               | genus                  | 3                | 3%          |
| <i>Ruminococcus flavefaciens</i>  | species                | 2                | 3%          |
| <i>Ruminococcus gnavus</i>        | species                | 2                | 3%          |
| <i>S24-7</i>                      | family                 | 60               | 3%          |
| <i>Unassigned</i>                 | N/A                    | 6                | 3%          |
| <i>Bacteroidales</i>              | order                  | 1                | Both        |
| <i>Bacteroides</i>                | genus                  | 1                | Both        |
| <i>Bacteroides ovatus</i>         | species                | 1                | Both        |
| <i>Bifidobacterium</i>            | genus                  | 1                | Both        |
| <i>Clostridiales</i>              | order                  | 5                | Both        |
| <i>Lacnospiraceae</i>             | family                 | 3                | Both        |
| <i>Lactobacillus</i>              | genus                  | 3                | Both        |
| <i>Lactobacillus vaginalis</i>    | species                | 1                | Both        |
| <i>Odoribacter</i>                | genus                  | 2                | Both        |
| <i>Oscillospira</i>               | genus                  | 10               | Both        |
| <i>Parabacteroides distasonis</i> | species                | 1                | Both        |
| <i>Peptococcaceae</i>             | family                 | 2                | Both        |
| <i>Rickenellaceae</i>             | family                 | 1                | Both        |
| <i>Ruminococcaceae</i>            | family                 | 3                | Both        |
| <i>Ruminococcus</i>               | genus                  | 3                | Both        |
| <i>Ruminococcus flavefaciens</i>  | species                | 1                | Both        |
| <i>S24-7</i>                      | family                 | 59               | Both        |
| <i>Xanthobacteraceae</i>          | family                 | 1                | Both        |
| <i>Unassigned</i>                 | N/A                    | 2                | Both        |
| <i>YS2</i>                        | order                  | 2                | Both        |

Table S2. Taxonomic identity of OTU's (out of 6232) shared across all individuals on a no oxalate diet, 3% oxalate diet, or both.
